# Supplementary material
Source: PubMed Central journal article supplement (PMC1299007)

## **Supplementary Material**

- 1) Details of the phylogenetic analysis**
- 2) Details of the scale-free network analysis**
- 3) Protein-protein interactions**
- 4) List of protein-protein interactions**
  - a) Mammalian**
    - i) E2A subnetwork**
    - ii) Arnt subnetwork**
    - iii) Max subnetwork**
    - iv) Other**
  - b) Drosophila**
- 5) Convergent topologies of the bHLH network**

### **1) Details of the phylogenetic analysis**

Phylogenetic relationships of the human bHLH domains were inferred by the Neighbor-Joining method using the Jones-Taylor-Thornton amino-acid replacement model, implemented with the PHYLIP package ([evolution.genetics.washington.edu/phylip.html](http://evolution.genetics.washington.edu/phylip.html)).

Sequences were taken from:

- a) Homo sapiens.*
- b) Ciona intestinalis.*
- c) Drosophila melanogaster.*
- d) Saccharomyces cerevisiae.*
- e) Kluyveromyces lactis.*
- f) Schisosaccharomyces pombe.*
- g) Neurospora crassa.*

The gene and ORF names for *Homo sapiens* and *Drosophila melanogaster* were taken from (Ledent *et al.*, 2002). The sequences of *Ciona intestinalis*, *Saccharomyces cerevisiae*, *Kluyveromyces lactis*, *Schisosaccharomyces pombe*, *Neurospora crassa* were identified by scanning ORF lists of their genomes, using Hidden Markov Models. The names correspond to their ORFs.

The multiple alignment of the bHLH domains was performed by clustalw (Tompson et al., 1994) and edited manually.

The coloured branches were used to reconstruct a summary of the tree shown in Figure 2a of the paper. That summary tree in Figure 2a is a cladogram and does not represent distances, contrary to the Neighbour Joining tree shown here.

#### References

- Thompson, J.D., Higgins, D.G. and Gibson, T.J. (1994) CLUSTAL W: improving the sensitivity of progressive multiple sequence alignment through sequence weighting, position-specific gap penalties and weight matrix choice. *Nucleic Acids Res*, **22**, 4673-4680.



## 2) Details of the scale-free network analysis

For the mammalian bHLH protein-interaction networks, we calculated the logarithm of the frequency of nodes with  $K$  interactions,  $\text{Ln}(P(K))$ , and plotted this against the logarithm of the number of interactions,  $\text{Ln}(K)$ . The plot of  $\text{Ln}(P(K)) - \text{Ln}(K)$  shows clearly that the bHLH protein interaction network is scale-free, because the distribution of connectivity decays as a power-law ( $P(K) \sim K^{-\gamma}$ , where  $\gamma=1$ ). Moreover, the interactions that were extracted solely from Transfac were sufficient to display the scale-free nature of the network.

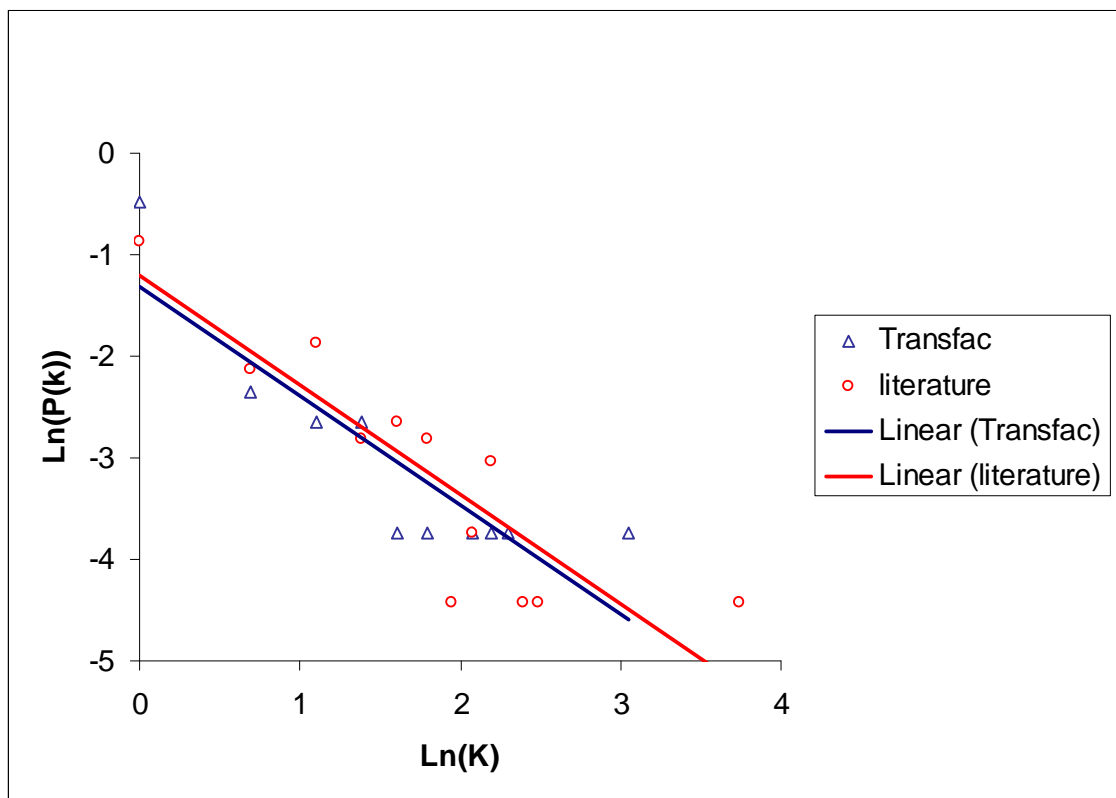

### 3) Protein-protein interactions

We extracted protein interactions for *Drosophila* and mammalian members of the bHLH class, mediated through the Basic Region - Helix-Loop-Helix domain. Protein interactions for mammals were extracted for both human and murine orthologues, due to their high amino-acid sequence identity (>80%). For example, the human A-factor<sub>(human)</sub> – B-factor<sub>(human)</sub> and mouse B-factor<sub>(mouse)</sub> – C-factor<sub>(mouse)</sub> interactions were collapsed in the mammalian A-factor<sub>(mammalian)</sub> – B-factor<sub>(mammalian)</sub> – C-factor<sub>(mammalian)</sub> interactions.

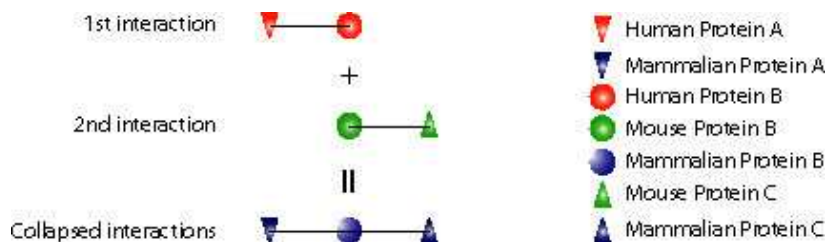

Protein interactions were initially extracted automatically from the TRANSFAC database (public release v4; Matys *et al.*, 2003). Later, this dataset was significantly enhanced by manual searches of PubMed ([www.ncbi.nlm.nih.gov](http://www.ncbi.nlm.nih.gov)). The list of *Drosophila*, murine, and human bHLH genes reported by Ledent *et al.* (2002) was used as our primary data set. A total of 78 mammalian genes connected by 127 interactions were retrieved. Seventeen of these interactions have been verified for the *Drosophila* orthologues as well and have been highlighted in Figure 2c with thicker lines. Most interactions have been identified by co-immunoprecipitation, Electrophoretic Mobility Shift Assay (EMSA), and Yeast Two Hybrid (Y2H) assays.

#### References

- Matys, V., Fricke, E., Geffers, R., Gossling, E., Haubrock, M., Hehl, R., Hornischer, K., Karas, D., Kel, A.E., Kel-Margoulis, O.V., Kloos, D.U., Land, S., Lewicki-Potapov, B., Michael, H., Munch, R., Reuter, I., Rotert, S., Saxel, H., Scheer, M., Thiele, S. and Wingender, E. (2003) TRANSFAC: transcriptional regulation, from patterns to profiles. *Nucleic Acids Res.* **31**, 374-378.

#### 4) List of protein-protein interactions

##### a) Mammals

##### i) E-protein Subnetwork interactions

E2A interacts with:

|             |                                           |
|-------------|-------------------------------------------|
| ABF-1       | Massari et al., 1998                      |
| AP-4        | Dear et al., 1997                         |
| BETA3       | Peyton et al., 1996                       |
| BHLHB4      | Bramblett et al., 2002                    |
| BHLHB5      | Xu et al., 2002                           |
| Capsulin    | Lu et al., 1998                           |
| cHairy1     | Leimeister et al., 2000                   |
| cMesol      | Buchburger et al., 1998                   |
| Dermo-1     | Dear et al., 1997                         |
| dHAND       | Yoon et al., 2000                         |
| E2A         | Dear et al., 1997                         |
| E2-2        | Yoon et al., 2000                         |
| eHAND       | Firulli et al., 2000; Yoon et al., 2000   |
| Eip-1 (HES) | Dear et al., 1997                         |
| Hash-1      | Persson et al., 2000                      |
| HEB         | Dear et al., 1997                         |
| HEN-1       | Brown & Baer, 1994                        |
| Hey2        | Leimeister et al., 2000                   |
| Id-1        | Langlands et al., 1997                    |
| Id-2        | Yoon et al., 2000; Langlands et al., 1997 |
| Id-3        | Yoon et al., 2000; Langlands et al., 1997 |
| Id-4        | Jogi et al., 2002                         |

|            |                                                                                  |
|------------|----------------------------------------------------------------------------------|
| Lyl-1      | Miyamoto et al., 1996                                                            |
| Mash-1     | Gradwohl et al., 1996; Li et al., 1995; Persson et al., 2000; Yoon et al., 2000  |
| Mash-2     | Johnson et al., 1992                                                             |
| Mash-3     | Yoshida et al., 2001                                                             |
| Math-1     | Yoon et al., 2000; Akazawa et al., 1995                                          |
| Math-2     | Shimizu et al., 1995                                                             |
| mesogenin1 | Yoon et al., 2000                                                                |
| Mist-1     | Lemercier et al., 1998                                                           |
| MRF-4/myf6 | Lin & Konieczny, 1992; Yoon et al., 2000                                         |
| Myf-5      | Braun et al., 1990                                                               |
| MyoD       | Dear et al., 1997; Li et al., 1995; Petropoulos & Skerjanc, 2000                 |
| Myogenin   | Chakraborty et al., 1991; Li et al., 1995                                        |
| NeuroD     | Mutoh et al., 1997                                                               |
| NeuroD2    | Farah et al., 2000                                                               |
| Ngn-2      | Gradwohl et al., 1996                                                            |
| N-twist    | Verzi et al., 2002                                                               |
| OUT(mouse) | Narumi et al., 2000                                                              |
| Paraxis    | Dear et al., 1997; Quertermus et al., 1994; Yoon et al., 2000                    |
| Scleraxis  | Dear et al., 1997, Li et al., 1995; Cserjesi et al., 1995; Carlberg et al., 2000 |
| Stra-13    | Dear et al., 1997                                                                |
| Tal-1      | Dear et al., 1997; Hsu et al., 1994                                              |
| Tal-2      | Xia et al., 1994; Li et al., 1995                                                |
| Twist      | Hamamori et al., 1997                                                            |
| USF        | Dear et al., 1997                                                                |

E2-2 interacts with:

|          |                        |
|----------|------------------------|
| ABF-1    | Massari et al., 1998   |
| Capsulin | Lu et al., 1998        |
| Hash-1   | Persson et al., 2000   |
| Id-1     | Langlands et al., 1997 |

|        |                              |
|--------|------------------------------|
| Id-2   | Langlands et al., 1997       |
| Id-3   | Langlands et al., 1997       |
| Id-4   | Jogi et al., 2002            |
| Mash-3 | Yoshida et al., 2001         |
| MyoD   | Petropoulos & Skerjanc, 2000 |

HEB interacts with:

|          |                              |
|----------|------------------------------|
| ABF-1    | Massari et al., 1998         |
| Capsulin | Lu et al., 1998              |
| Id-1     | Langlands et al., 1997       |
| Id-2     | Langlands et al., 1997       |
| Id-3     | Langlands et al., 1997       |
| Mash-3   | Yoshida et al., 2001         |
| MyoD     | Petropoulos & Skerjanc, 2000 |

References

- Akazawa, C., Ishibashi, M., Shimizu, C., Nakanishi, S. & Kageyama, R. A mammalian helix-loop-helix factor structurally related to the product of *Drosophila* proneural gene *atonal* is a positive transcriptional regulator expressed in the developing nervous system. *J Biol Chem* 270, 8730-8 (1995).
- Bramblett, D. E., Copeland, N. G., Jenkins, N. A. & Tsai, M. J. BHLHB4 is a bHLH transcriptional regulator in pancreas and brain that marks the dimesencephalic boundary. *Genomics* 79, 402-12 (2002).
- Braun, T., Winter, B., Bober, E. & Arnold, H. H. Transcriptional activation domain of the muscle-specific gene-regulatory protein *myf5*. *Nature* 346, 663-5 (1990).
- Brown, L. & Baer, R. HEN1 encodes a 20-kilodalton phosphoprotein that binds an extended E-box motif as a homodimer. *Mol Cell Biol* 14, 1245-55 (1994).
- Buchberger, A., Seidl, K., Klein, C., Eberhardt, H. & Arnold, H. H. cMeso-1, a novel bHLH transcription factor, is involved in somite formation in chicken embryos. *Dev Biol* 199, 201-15 (1998).



- Carlberg, A. L., Tuan, R. S. & Hall, D. J. Regulation of scleraxis function by interaction with the bHLH protein E47. *Mol Cell Biol Res Commun* 3, 82-6 (2000).
- Chakraborty, T., Brennan, T. J., Li, L., Edmondson, D. & Olson, E. N. Inefficient homooligomerization contributes to the dependence of myogenin on E2A products for efficient DNA binding. *Mol Cell Biol* 11, 3633-41 (1991).
- Cserjesi, P. et al. Scleraxis: a basic helix-loop-helix protein that prefigures skeletal formation during mouse embryogenesis. *Development* 121, 1099-110 (1995).
- Dear, T. N. et al. Identification of interaction partners for the basic-helix-loop-helix protein E47. *Oncogene* 14, 891-8 (1997).
- Farah, M. H. et al. Generation of neurons by transient expression of neural bHLH proteins in mammalian cells. *Development* 127, 693-702 (2000).
- Firulli, B. A., Hadzic, D. B., McDaid, J. R. & Firulli, A. B. The basic helix-loop-helix transcription factors dHAND and eHAND exhibit dimerization characteristics that suggest complex regulation of function. *J Biol Chem* 275, 33567-73 (2000).
- Gradwohl, G., Fode, C. & Guillemot, F. Restricted expression of a novel murine atonal-related bHLH protein in undifferentiated neural precursors. *Dev Biol* 180, 227-41 (1996).
- Hamamori, Y., Wu, H. Y., Sartorelli, V. & Kedes, L. The basic domain of myogenic basic helix-loop-helix (bHLH) proteins is the novel target for direct inhibition by another bHLH protein, Twist. *Mol Cell Biol* 17, 6563-73 (1997).
- Hsu, H. L., Wadman, I., Tsan, J. T. & Baer, R. Positive and negative transcriptional control by the TAL1 helix-loop-helix protein. *Proc Natl Acad Sci U S A* 91, 5947-51 (1994).
- Jogi, A., Persson, P., Grynfeld, A., Pahlman, S. & Axelson, H. Modulation of basic helix-loop-helix transcription complex formation by Id proteins during neuronal differentiation. *J Biol Chem* 277, 9118-26 (2002).
- Johnson, J. E., Birren, S. J., Saito, T. & Anderson, D. J. DNA binding and transcriptional regulatory activity of mammalian achaete-scute homologous (MASH) proteins revealed by interaction with a muscle-specific enhancer. *Proc Natl Acad Sci U S A* 89, 3596-600 (1992).
- Langlands, K., Yin, X., Anand, G. & Prochownik, E. V. Differential interactions of Id proteins with basic-helix-loop-helix transcription factors. *J Biol Chem* 272, 19785-93 (1997).

- Leimeister, C. et al. Oscillating expression of c-Hey2 in the presomitic mesoderm suggests that the segmentation clock may use combinatorial signaling through multiple interacting bHLH factors. *Dev Biol* 227, 91-103 (2000).
- Lemerrier, C., To, R. Q., Carrasco, R. A. & Konieczny, S. F. The basic helix-loop-helix transcription factor Mist1 functions as a transcriptional repressor of myoD. *Embo J* 17, 1412-22 (1998).
- Li, L., Cserjesi, P. & Olson, E. N. Dermo-1: a novel twist-related bHLH protein expressed in the developing dermis. *Dev Biol* 172, 280-92 (1995).
- Lin, H. & Konieczny, S. F. Identification of MRF4, myogenin, and E12 oligomer complexes by chemical cross-linking and two-dimensional gel electrophoresis. *J Biol Chem* 267, 4773-80 (1992).
- Lu, J., Richardson, J. A. & Olson, E. N. Capsulin: a novel bHLH transcription factor expressed in epicardial progenitors and mesenchyme of visceral organs. *Mech Dev* 73, 23-32 (1998).
- Massari, M. E. et al. Characterization of ABF-1, a novel basic helix-loop-helix transcription factor expressed in activated B lymphocytes. *Mol Cell Biol* 18, 3130-9 (1998).
- Miyamoto, A., Cui, X., Naumovski, L. & Cleary, M. L. Helix-loop-helix proteins LYL1 and E2a form heterodimeric complexes with distinctive DNA-binding properties in hematolymphoid cells. *Mol Cell Biol* 16, 2394-401 (1996).
- Mutoh, H. et al. The basic helix-loop-helix transcription factor BETA2/NeuroD is expressed in mammalian enteroendocrine cells and activates secretin gene expression. *Proc Natl Acad Sci U S A* 94, 3560-4 (1997).
- Narumi, O. et al. OUT, a novel basic helix-loop-helix transcription factor with an Id-like inhibitory activity. *J Biol Chem* 275, 3510-21 (2000).
- Persson, P., Jogi, A., Grynfeld, A., Pahlman, S. & Axelson, H. HASH-1 and E2-2 are expressed in human neuroblastoma cells and form a functional complex. *Biochem Biophys Res Commun* 274, 22-31 (2000).
- Petropoulos, H. & Skerjanc, I. S. Analysis of the inhibition of MyoD activity by ITF-2B and full-length E12/E47. *J Biol Chem* 275, 25095-101 (2000).

- Peyton, M. et al. BETA3, a novel helix-loop-helix protein, can act as a negative regulator of BETA2 and MyoD-responsive genes. *Mol Cell Biol* 16, 626-33 (1996).
- Quertermous, E. E., Hidai, H., Blonar, M. A. & Quertermous, T. Cloning and characterization of a basic helix-loop-helix protein expressed in early mesoderm and the developing somites. *Proc Natl Acad Sci U S A* 91, 7066-70 (1994).
- Shimizu, C., Akazawa, C., Nakanishi, S. & Kageyama, R. MATH-2, a mammalian helix-loop-helix factor structurally related to the product of *Drosophila* proneural gene atonal, is specifically expressed in the nervous system. *Eur J Biochem* 229, 239-48 (1995).
- Verzi, M. P. et al. N-twist, an evolutionarily conserved bHLH protein expressed in the developing CNS, functions as a transcriptional inhibitor. *Dev Biol* 249, 174-90 (2002).
- Xia, Y., Hwang, L. Y., Cobb, M. H. & Baer, R. Products of the TAL2 oncogene in leukemic T cells: bHLH phosphoproteins with DNA-binding activity. *Oncogene* 9, 1437-46 (1994).
- Xu, Z. P. et al. Functional and structural characterization of the human gene BHLHB5, encoding a basic helix-loop-helix transcription factor. *Genomics* 80, 311-8 (2002).
- Yoon, J. K., Moon, R. T. & Wold, B. The bHLH class protein pMesogenin1 can specify paraxial mesoderm phenotypes. *Dev Biol* 222, 376-91 (2000).
- Yoshida, S. et al. Sgn1, a basic helix-loop-helix transcription factor delineates the salivary gland duct cell lineage in mice. *Dev Biol* 240, 517-30 (2001).

## ii) Arnt-network interactions

Arnt interacts with:

|       |                                                        |
|-------|--------------------------------------------------------|
| Ahr   | Hahn, 2002; Swanson, 2002                              |
| AhrR  | Hahn, 2002                                             |
| BMAL1 | Hogenesch et al., 1997                                 |
| Hif2a | Hogenesch et al., 1997; Gu et al., 2000; Swanson, 2002 |
| Hif1a | Hogenesch et al., 1997; Gu et al., 2000; Swanson, 2002 |
| Hif3a | Gu et al., 2000                                        |
| NPAS1 | Hogenesch et al., 1997; Gu et al., 2000                |
| PER   | Hogenesch et al., 1997                                 |

|      |                                    |
|------|------------------------------------|
| Sim1 | Swanson, 2002; Chrast et al., 1997 |
| Sim2 | Swanson, 2002; Chrast et al., 1997 |
| Hey1 | Chin et al., 2000                  |
| Hey2 | Chin et al., 2000; Swanson, 2002   |

Arnt2 interacts with:

|       |                     |
|-------|---------------------|
| Hif2a | Gu et al., 2000     |
| Hif1a | Gu et al., 2000     |
| Hif3a | Gu et al., 2000     |
| Sim1  | Chrast et al., 1997 |
| Sim2  | Chrast et al., 1997 |

BMAL-1 interacts with:

|       |                        |
|-------|------------------------|
| Dec1  | Honma et al., 2002     |
| Dec2  | Honma et al., 2002     |
| HIF1a | Gu et al., 2000        |
| Arnt  | Hogenesch et al., 1997 |

BMAL2 interacts with:

|       |                        |
|-------|------------------------|
| HIF1a | Hogenesch et al., 2000 |
| CLOCK | Hogenesch et al., 2000 |
| NPAS2 | Hogenesch et al., 2000 |

References

- Chin, M. T. et al. Cardiovascular basic helix loop helix factor 1, a novel transcriptional repressor expressed preferentially in the developing and adult cardiovascular system. *J Biol Chem* 275, 6381-7 (2000).

- Chrast, R. et al. Cloning of two human homologs of the *Drosophila* single-minded gene SIM1 on chromosome 6q and SIM2 on 21q within the Down syndrome chromosomal region. *Genome Res* 7, 615-24 (1997).
- Gu, Y. Z., Hogenesch, J. B. & Bradfield, C. A. The PAS superfamily: sensors of environmental and developmental signals. *Annu Rev Pharmacol Toxicol* 40, 519-61 (2000).
- Hahn, M. E. The aryl hydrocarbon receptor: a comparative perspective. *Comp Biochem Physiol C Pharmacol Toxicol Endocrinol* 121, 23-53 (1998).
- Hahn, M. E. Aryl hydrocarbon receptors: diversity and evolution. *Chem Biol Interact* 141, 131-60 (2002).
- Hogenesch, J. B. et al. Characterization of a subset of the basic-helix-loop-helix-PAS superfamily that interacts with components of the dioxin signaling pathway. *J Biol Chem* 272, 8581-93 (1997).
- Hogenesch, J. B. et al. The basic helix-loop-helix-PAS protein MOP9 is a brain-specific heterodimeric partner of circadian and hypoxia factors. *J Neurosci* 20, RC83 (2000).
- Honma, S. et al. Dec1 and Dec2 are regulators of the mammalian molecular clock. *Nature* 419, 841-4 (2002).
- Swanson, H. I. DNA binding and protein interactions of the AHR/ARNT heterodimer that facilitate gene activation. *Chem Biol Interact* 141, 63-76 (2002).

### iii) Max network interactions

Max interacts with:

|       |               |
|-------|---------------|
| c-Myc | Luscher, 2001 |
| L-Myc | Luscher, 2001 |
| Mad1  | Luscher, 2001 |
| Mad3  | Luscher, 2001 |
| Mad4  | Luscher, 2001 |
| Max   | Luscher, 2001 |
| Mga   | Luscher, 2001 |
| Mnt   | Luscher, 2001 |

Mxi1            Luscher, 2001

N-Myc           Luscher, 2001

Mlx interacts with:

Mad1            Luscher, 2001

Mad4            Luscher, 2001

Mlx              Luscher, 2001

Mnt              Luscher, 2001; Baudino & Cleveland, 2001

MondoA         Luscher, 2001

Wbscr14        Luscher, 2001

References

- Baudino, T. A. & Cleveland, J. L (2001). The Max network gone mad. *Mol Cell Biol* 21, 691-702.
- Luscher, B (2001). Function and regulation of the transcription factors of the Myc/Max/Mad network. *Gene* 277, 1-14.

#### **iv) Other Interactions**

dHAND interacts with:

dHAND         Firulli et al., 2000

E2A             Firulli et al., 2000

eHAND         Firulli et al., 2000

Hey1            Firulli et al., 2000

Hey2            Firulli et al., 2000

HeyL            Firulli et al., 2000

eHAND interacts with:

|       |  |                      |
|-------|--|----------------------|
| Ash1  |  | Firulli et al., 2000 |
| dHAND |  | Firulli et al., 2000 |
| E2A   |  | Firulli et al., 2000 |
| eHAND |  | Firulli et al., 2000 |
| Hey1  |  | Firulli et al., 2000 |
| Hey2  |  | Firulli et al., 2000 |
| HeyL  |  | Firulli et al., 2000 |
| MyoD  |  | Firulli et al., 2000 |

Other dimers:

|         |          |                         |
|---------|----------|-------------------------|
| Abf1    | Id2      | Wong et al., 2001       |
| Ap4     | Ap4      | Hu et al., 1990         |
| Ash3    | Ash3     | Yoshida et al., 2001    |
| Ash3    | MyoD     | Yoshida et al., 2001    |
| cHairy1 | cHairy1  | Leimeister et al., 2000 |
| cHey1   | cHairy1  | Leimeister et al., 2000 |
| cHey1   | cHey1    | Leimeister et al., 2000 |
| cHey1   | cHey2    | Leimeister et al., 2000 |
| cHey2   | cHairy1  | Leimeister et al., 2000 |
| cHey2   | cHey2    | Leimeister et al., 2000 |
| Dec1    | Dec1     | St-Pierre et al., 2002  |
| Dec1    | Ash1     | Boudjelal et al., 1997  |
| Hes1    | Id1      | Jogi et al., 2002       |
| Hes1    | Id2      | Jogi et al., 2002       |
| Hes1    | Id3      | Jogi et al., 2002       |
| Hes1    | Id4      | Jogi et al., 2002       |
| Id1     | Myf6     | Langlands et al., 1997  |
| Id1     | Myogenin | Langlands et al., 1997  |
| Id2     | Myf6     | Langlands et al., 1997  |
| Id2     | Myogenin | Langlands et al., 1997  |

|       |          |                                               |
|-------|----------|-----------------------------------------------|
| Id3   | Myf5     | Langlands et al., 1997                        |
| Id3   | Myf6     | Langlands et al., 1997                        |
| Id3   | MyoD     | Langlands et al., 1997                        |
| Id3   | Myogenin | Langlands et al., 1997                        |
| Id4   | Hes1     | Jogi et al., 2002                             |
| Id4   | MyoD     | Jogi et al., 2002                             |
| Mist1 | Mist1    | Lemercier et al., 1998                        |
| Mist1 | Myf6     | Lemercier et al., 1998                        |
| Mist1 | MyoD     | Lemercier et al., 1998                        |
| Myf5  | Id1      | Langlands et al., 1997                        |
| Myf5  | Id2      | Langlands et al., 1997                        |
| MyoD  | Id       | Benezra et al., 1990; Puri & Sartorelli, 2000 |
| MyoD  | Id1      | Langlands et al., 1997                        |
| MyoD  | Id2      | Langlands et al., 1997                        |
| Ngn2  | Ash1     | Gradwohl et al., 1996                         |
| Nsc1  | Nsc1     | Brown & Baer, 1994                            |
| Twist | Twist    | Hamamori et al., 1997                         |
| Usf1  | Usf1     | Dhar & Taneja, 2001                           |
| Usf2  | Usf2     | Dhar & Taneja, 2001                           |
| Usf1  | Usf2     | Dhar & Taneja, 2001                           |

All 4 Mitf family genes interact among them      Hemesath et al., 1994

All 4 COE interact among them      Wang et al., 2002 ; Wang et al., 1997



## References

- Benezra, R., Davis, R. L., Lockshon, D., Turner, D. L. & Weintraub, H (1990). The protein Id: a negative regulator of helix-loop-helix DNA binding proteins. *Cell* 61, 49-59 .
- Boudjelal, M. et al., (1997). Overexpression of Stra13, a novel retinoic acid-inducible gene of the basic helix-loop-helix family, inhibits mesodermal and promotes neuronal differentiation of P19 cells. *Genes Dev* 11, 2052-65.
- Brown, L. & Baer, R (1994). HEN1 encodes a 20-kilodalton phosphoprotein that binds an extended E-box motif as a homodimer. *Mol Cell Biol* 14, 1245-55.
- Dhar, M. & Taneja, R (2001). Cross-regulatory interaction between Stra13 and USF results in functional antagonism. *Oncogene* 20, 4750-6.
- Firulli, B. A., Hadzic, D. B., McDaid, J. R. & Firulli, A. B (2000). The basic helix-loop-helix transcription factors dHAND and eHAND exhibit dimerization characteristics that suggest complex regulation of function. *J Biol Chem* 275, 33567-73.
- Gradwohl, G., Fode, C. & Guillemot, F (1996). Restricted expression of a novel murine atonal-related bHLH protein in undifferentiated neural precursors. *Dev Biol* 180, 227-41.
- Hamamori, Y., Wu, H. Y., Sartorelli, V. & Kedes, L (1997). The basic domain of myogenic basic helix-loop-helix (bHLH) proteins is the novel target for direct inhibition by another bHLH protein, Twist. *Mol Cell Biol* 17, 6563-73.
- Hemesath, T. J. et al., (1994). microphthalmia, a critical factor in melanocyte development, defines a discrete transcription factor family. *Genes Dev* 8, 2770-80.
- Hu, Y. F., Luscher, B., Admon, A., Mermod, N. & Tjian, R (1990). Transcription factor AP-4 contains multiple dimerization domains that regulate dimer specificity. *Genes Dev* 4, 1741-52.
- Jogi, A., Persson, P., Grynfeld, A., Pahlman, S. & Axelson, H (2002). Modulation of basic helix-loop-helix transcription complex formation by Id proteins during neuronal differentiation. *J Biol Chem* 277, 9118-26.
- Langlands, K., Yin, X., Anand, G. & Prochownik, E. V (1997). Differential interactions of Id proteins with basic-helix-loop-helix transcription factors. *J Biol Chem* 272, 19785-93.
- Leimeister, C. et al., (2000). Oscillating expression of c-Hey2 in the presomitic mesoderm suggests that the segmentation clock may use combinatorial signaling through multiple interacting bHLH factors. *Dev Biol* 227, 91-103.

- Lemercier, C., To, R. Q., Carrasco, R. A. & Konieczny, S. F (1998). The basic helix-loop-helix transcription factor Mist1 functions as a transcriptional repressor of myoD. *Embo J* 17, 1412-22.
- Puri, P. L. & Sartorelli, V (2000). Regulation of muscle regulatory factors by DNA-binding, interacting proteins, and post-transcriptional modifications. *J Cell Physiol* 185, 155-73.
- St-Pierre, B., Flock, G., Zacksenhaus, E. & Egan, S. E (2002). Stra13 homodimers repress transcription through class B E-box elements. *J Biol Chem* 277, 46544-51.
- Sun, J. et al., (2001). Regulation of myogenic terminal differentiation by the hairy-related transcription factor CHF2. *J Biol Chem* 276, 18591-6.
- Wang, S. S., Tsai, R. Y. & Reed, R. R (1997). The characterization of the Olf-1/EBF-like HLH transcription factor family: implications in olfactory gene regulation and neuronal development. *J Neurosci* 17, 4149-58.
- Wang, S. S., Betz, A. G. & Reed, R. R (2002). Cloning of a novel Olf-1/EBF-like gene, O/E-4, by degenerate oligo-based direct selection. *Mol Cell Neurosci* 20, 404-14.
- Wong, J. et al., (2001). Characterization of a basic helix-loop-helix protein, ABF-1: nuclear localization, transcriptional properties, and interaction with Id-2. *DNA Cell Biol* 20, 465-71.
- Yoshida, S. et al., (2001). Sgn1, a basic helix-loop-helix transcription factor delineates the salivary gland duct cell lineage in mice. *Dev Biol* 240, 517-30.

#### **b) *Drosophila melanogaster* bHLH protein interactions**

A Group - Da subnetwork interactions

Da interacts with

|       |                                                                 |
|-------|-----------------------------------------------------------------|
| Ac    | Cabrera and Alonso, 1991                                        |
| Sc    | Cabrera and Alonso, 1991                                        |
| Lsc   | Cabrera and Alonso, 1991                                        |
| Emc   | Alifragis et al., 1997; Cabrera et al., 1994; Giot et al., 2003 |
| Twist | Castanon et al., 2001                                           |
| Ato   | Jarman et al., 1993                                             |

|      |                        |
|------|------------------------|
| nau  | Zhang et al., 1999     |
| amos | Huang et al., 2000     |
| Scl  | Giot et al., 2003      |
| Fer3 | Giot et al., 2003      |
| m5   | Alifragis et al., 1997 |
| m7   | Alifragis et al., 1997 |
| m8   | Alifragis et al., 1997 |
| mb   | Alifragis et al., 1997 |
| mg   | Alifragis et al., 1997 |

#### C Group - Tango subnetwork interactions

Tango interacts with:

|      |                         |
|------|-------------------------|
| ss   | Emmons et al., 1999     |
| Sim  | Sonnenfeld et al., 1997 |
| Sima | Sonnenfeld et al., 1997 |
| Trh  | Sonnenfeld et al., 1997 |

Cycle interacts with:

|       |                  |
|-------|------------------|
| Clock | Bae et al., 2000 |
|-------|------------------|

#### B Group - Max network interactions

dMax interacts with:

|      |                                         |
|------|-----------------------------------------|
| dmyc | Gallant et al., 1996; Giot et al., 2003 |
| dMnt | Orian et al., 2003; Giot et al., 2003   |

dMlx interacts with:

|         |                                                  |
|---------|--------------------------------------------------|
| dMondoA | Ayer (personal communication); Giot et al., 2003 |
|---------|--------------------------------------------------|

Other dimers:

|     |      |                                                                 |
|-----|------|-----------------------------------------------------------------|
| Emc | Ac   | Cabrera et al., 1994; Alifragis et al., 1997                    |
| Emc | Sc   | Cabrera et al., 1994; Alifragis et al., 1997; Giot et al., 2003 |
| Emc | Lsc  | Cabrera et al., 1994                                            |
| Emc | Nscl | Giot et al., 2003                                               |
| mb  | mb   | Alifragis et al., 1997                                          |
| mb  | mg   | Alifragis et al., 1997                                          |
| mb  | md   | Alifragis et al., 1997                                          |
| mb  | m3   | Alifragis et al., 1997                                          |
| mb  | m5   | Alifragis et al., 1997                                          |
| mb  | m7   | Alifragis et al., 1997                                          |
| mb  | m8   | Alifragis et al., 1997                                          |
| mg  | mg   | Alifragis et al., 1997                                          |
| mg  | md   | Alifragis et al., 1997                                          |
| mg  | m3   | Alifragis et al., 1997                                          |
| mg  | m5   | Alifragis et al., 1997                                          |
| mg  | m7   | Alifragis et al., 1997                                          |
| mg  | m8   | Alifragis et al., 1997                                          |
| md  | md   | Alifragis et al., 1997                                          |
| md  | m3   | Alifragis et al., 1997                                          |
| md  | m5   | Alifragis et al., 1997                                          |
| md  | m7   | Alifragis et al., 1997                                          |
| md  | m8   | Alifragis et al., 1997                                          |
| m3  | m5   | Alifragis et al., 1997                                          |
| m5  | m5   | Alifragis et al., 1997                                          |
| m6  | m7   | Alifragis et al., 1997                                          |
| m7  | m8   | Alifragis et al., 1997                                          |
| m7  | m8   | Alifragis et al., 1997                                          |
| m7  | NSCL | Giot et al., 2003                                               |

|       |       |                                           |
|-------|-------|-------------------------------------------|
| m8    | m8    | Alifragis et al., 1997                    |
| ato   | mb    | Alifragis et al., 1997                    |
| ato   | m7    | Alifragis et al., 1997                    |
| ato   | m3    | Alifragis et al., 1997                    |
| Ac    | mb    | Alifragis et al., 1997                    |
| Ac    | mg    | Alifragis et al., 1997                    |
| Ac    | m3    | Alifragis et al., 1997; Giot et al., 2003 |
| Ac    | m7    | Alifragis et al., 1997                    |
| Sc    | m3    | Alifragis et al., 1997                    |
| Sc    | m7    | Alifragis et al., 1997                    |
| Sc    | mb    | Alifragis et al., 1997                    |
| Sc    | mg    | Alifragis et al., 1997                    |
| Ase   | m3    | Alifragis et al., 1997                    |
| Ase   | m7    | Alifragis et al., 1997                    |
| Ase   | mb    | Alifragis et al., 1997                    |
| Ase   | mg    | Alifragis et al., 1997                    |
| Twist | Twist | Castanon et al., 2001                     |
| Hey   | dpn   | Giot et al., 2003                         |
| tap   | mb    | Giot et al., 2003                         |
| tap   | m5    | Giot et al., 2003                         |

## References

- Alifragis, P., Poortinga, G., Parkhurst, S.M. and Delidakis, C. (1997) A network of interacting transcriptional regulators involved in *Drosophila* neural fate specification revealed by the yeast two-hybrid system. *Proc Natl Acad Sci U S A*, 94, 13099-13104.
- Ayer (personal communication)
- Bae, K., Lee, C., Hardin, P.E. and Edery, I. (2000) dCLOCK is present in limiting amounts and likely mediates daily interactions between the dCLOCK-CYC transcription factor and the PER-TIM complex. *J Neurosci*, 20, 1746-1753.

- Cabrera, C.V. and Alonso, M.C. (1991) Transcriptional activation by heterodimers of the achaete-scute and daughterless gene products of *Drosophila*. *Embo J*, 10, 2965-2973.
- Cabrera, C.V., Alonso, M.C. and Huikeshoven, H. (1994) Regulation of scute function by extramacrochaete in vitro and in vivo. *Development*, 120, 3595-3603.
- Castanon, I., Von Stetina, S., Kass, J. and Baylies, M.K. (2001) Dimerization partners determine the activity of the Twist bHLH protein during *Drosophila* mesoderm development. *Development*, 128, 3145-3159.
- Emmons, R.B., Duncan, D., Estes, P.A., Kiefel, P., Mosher, J.T., Sonnenfeld, M., Ward, M.P., Duncan, I. and Crews, S.T. (1999) The spineless-aristapedia and tango bHLH-PAS proteins interact to control antennal and tarsal development in *Drosophila*. *Development*, 126, 3937-3945.
- Gallant, P., Shio, Y., Cheng, P.F., Parkhurst, S.M. and Eisenman, R.N. (1996) Myc and Max homologs in *Drosophila*. *Science*, 274, 1523-1527.
- Giot, L., Bader, J.S., Brouwer, C., Chaudhuri, A., Kuang, B., Li, Y., Hao, Y.L., Ooi, C.E., Godwin, B., Vitols, E., Vijayadamodar, G., Pochart, P., Machineni, H., Welsh, M., Kong, Y., Zerhusen, B., Malcolm, R., Varrone, Z., Collis, A., Minto, M., Burgess, S., McDaniel, L., Stimpson, E., Spriggs, F., Williams, J., Neurath, K., Ioime, N., Agee, M., Voss, E., Furtak, K., Renzulli, R., Aanensen, N., Carrola, S., Bickelhaupt, E., Lazovatsky, Y., DaSilva, A., Zhong, J., Stanyon, C.A., Finley Jr, R.L., White, K.P., Braverman, M., Jarvie, T., Gold, S., Leach, M., Knight, J., Shimkets, R.A., McKenna, M.P., Chant, J. and Rothberg, J.M. (2003) A Protein Interaction Map of *Drosophila melanogaster*. *Science*.
- Huang, M.L., Hsu, C.H. and Chien, C.T. (2000) The proneural gene amos promotes multiple dendritic neuron formation in the *Drosophila* peripheral nervous system. *Neuron*, 25, 57-67.
- Jarman, A.P., Grau, Y., Jan, L.Y. and Jan, Y.N. (1993) atonal is a proneural gene that directs chordotonal organ formation in the *Drosophila* peripheral nervous system. *Cell*, 73, 1307-1321.
- Orian, A., Van Steensel, B., Delrow, J., Bussemaker, H.J., Li, L., Sawado, T., Williams, E., Loo, L.W., Cowley, S.M., Yost, C., Pierce, S., Edgar, B.A., Parkhurst, S.M. and Eisenman, R.N. (2003) Genomic binding by the *Drosophila* Myc, Max, Mad/Mnt transcription factor network. *Genes Dev*, 17, 1101-1114.

- Sonnenfeld, M., Ward, M., Nystrom, G., Mosher, J., Stahl, S. and Crews, S. (1997) The *Drosophila tango* gene encodes a bHLH-PAS protein that is orthologous to mammalian Arnt and controls CNS midline and tracheal development. *Development*, 124, 4571-4582.
- Zhang, J.M., Chen, L., Krause, M., Fire, A. and Paterson, B.M. (1999) Evolutionary conservation of MyoD function and differential utilization of E proteins. *Dev Biol*, 208, 465-472.

5) Convergent topologies of the bHLH heterodimerisation network

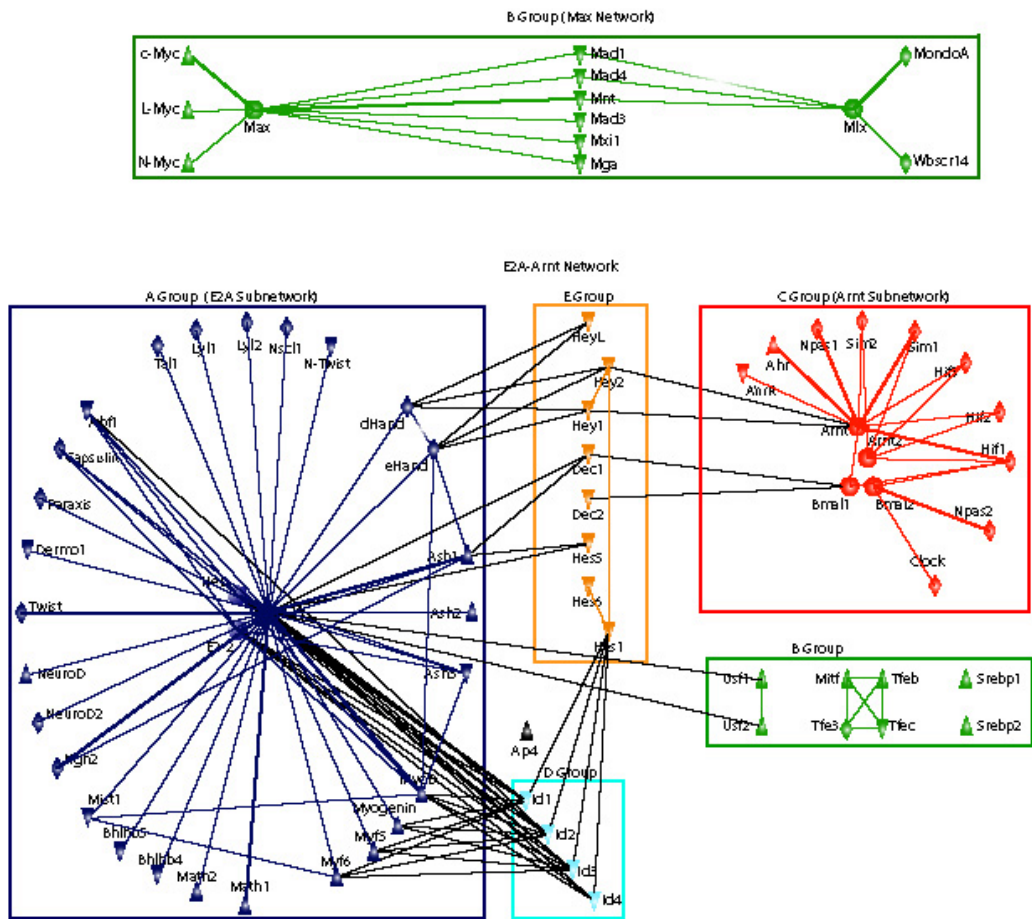

Supplement: 5-7400096s1.pdf [file 5-7400096s1.pdf]
